# Supplementary material for: Hydrogenation of γ-valerolactone in ethanol over Pd nanoparticles supported on sulfonic acid functionalized MIL-101
Source: Royal Society of Chemistry journal article supplement (doi:10.1039/c4ra05250a), 2014-08-22
Supplement: c4ra05250a1.pdf [file c4ra05250a1.pdf]

**Supporting Information to**  
**Hydrogenation of  $\gamma$ -valerolactone in ethanol over Pd nanoparticles supported on sulfonic acid**  
**functionalized MIL-101**

Damin Zhang<sup>a</sup>, Feiyang Ye<sup>a</sup>, Yejun Guan<sup>\*a</sup>, Yimeng Wang<sup>a</sup>, Emiel J M Hensen<sup>b</sup>

**Contents:**

Figure S1 Typical SEM images of Pd/ MIL-101-SO<sub>3</sub>H(x): (a) Pd/ MIL-101-SO<sub>3</sub>H(25), (b) Pd/ MIL-101-SO<sub>3</sub>H(50), (c) Pd/MIL-101-SO<sub>3</sub>H(80), and (d) Pd/MIL-101-SO<sub>3</sub>H(100).

Figure S2. Selected area EDX of Pd/MIL-101-SO<sub>3</sub>H(100) catalyst: (Area 1) aggregated Pd particle and (Area 2) MIL-101-SO<sub>3</sub>H(100) support with well-dispersed Pd particles.

Figure S3 HRTEM images of supported Pd catalysts: (a) Pd/MIL-101-SO<sub>3</sub>H(25), (b) Pd/MIL-101-SO<sub>3</sub>H(50), (c) Pd/MIL-101-SO<sub>3</sub>H(80), and (d) Pd/MIL-101-SO<sub>3</sub>H(100).

Table S1. Effect of Pd loading on the hydrogenation activity of GVL upgrading in ethanol over Pd/ MIL-101-SO<sub>3</sub>H(100).

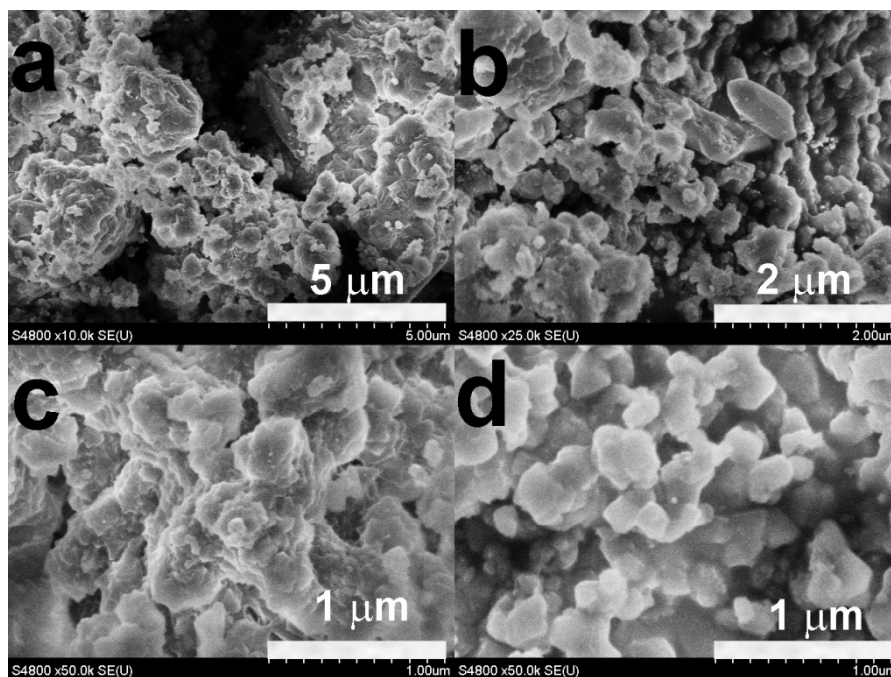

Figure S1. Typical SEM images of Pd/MIL-101-SO<sub>3</sub>H(x): (a) Pd/MIL-101-SO<sub>3</sub>H(25), (b) Pd/MIL-101-SO<sub>3</sub>H(50), (c) Pd/MIL-101-SO<sub>3</sub>H(80), and (d) Pd/MIL-101-SO<sub>3</sub>H(100).

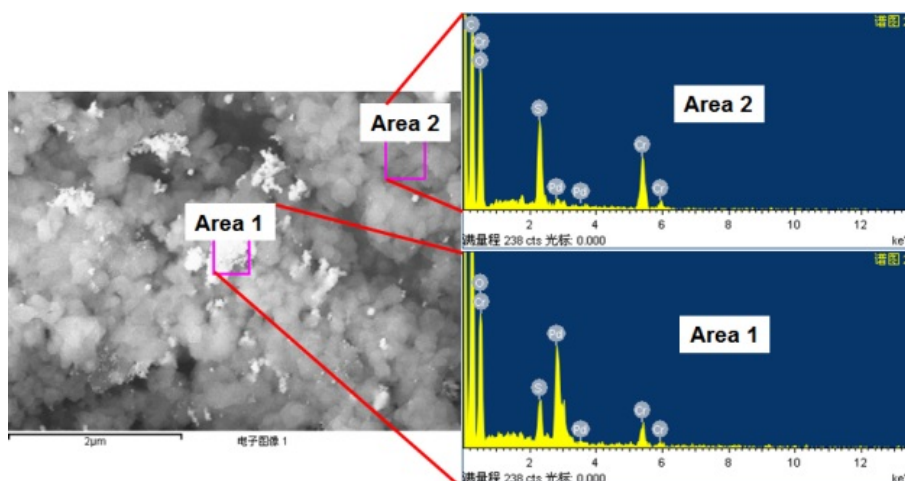

Figure S2. Selected area EDX of Pd/MIL-101-SO<sub>3</sub>H(100) catalyst: (Area 1) aggregated Pd particle and (Area 2) MIL-101-SO<sub>3</sub>H(100) support with well-dispersed Pd particles.

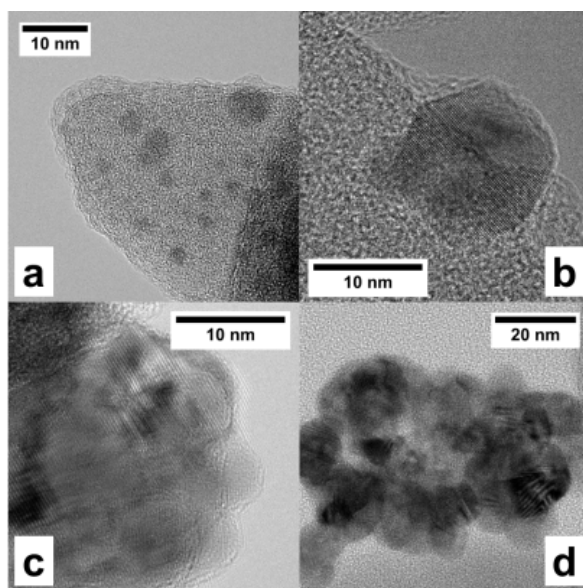

**Figure S3** HRTEM images of supported Pd catalysts: (a) Pd/MIL-101-SO<sub>3</sub>H(25), (b) Pd/MIL-101-SO<sub>3</sub>H(50), (c) Pd/MIL-101-SO<sub>3</sub>H(80), and (d) Pd/MIL-101-SO<sub>3</sub>H(100).

**Table S1.** Effect of Pd loading on the hydrogenation activity of GVL upgrading in ethanol over Pd/MIL-101-SO<sub>3</sub>H(100). Reaction conditions: 100 mg catalyst, 10 mmol GVL, 5820  $\mu$ L ethanol, 200  $^{\circ}$ C, 10 h. **(1)** 4-hydroxy-ethylvalerate, **(2)** ethyl 4-ethoxy pentanoate, **(3)** ethyl pentenoate, **(4)** ethyl valerate.

| Pd Loading<br>(wt.%) | GVL Conv.(%) | Sel. (%) |          |          |          |
|----------------------|--------------|----------|----------|----------|----------|
|                      |              | <b>1</b> | <b>2</b> | <b>3</b> | <b>4</b> |
| 1.0                  | 52           | 12       | 65       | 8.0      | 15       |
| 2.5                  | 50           | 8.0      | 66       | 6.0      | 20       |
| 5.0                  | 48           | 9.0      | 64       | 2.0      | 25       |
